# Supplementary material
Source: publisher figshare collection journal article supplement (https://brill.figshare.com/ndownloader/files/17459207)
Supplement: Supplementary file 1 [file 17459207]

**Evidence for the dissolution of the *Calyptra minuticornis*  
*novaepommeraniae* (Strand) and *C. minuticornis minuticornis*  
(Guenée) sub-species distinction (Insecta: Lepidoptera: Erebidae)**

**Julia L. Snyder<sup>a,c,\*</sup>, Alberto Zilli<sup>b</sup> and Jennifer M. Zaspel<sup>c,d</sup>**

<sup>a</sup>The Field Museum of Natural History, Science & Education, Gantz Family Collections Center, 1400 S Lake Shore Drive, Chicago, IL 60605, USA

<sup>b</sup>The Natural History Museum, Life Sciences, Insect Division – DC2-2N, Cromwell Road, London SW7 5BD, UK

<sup>c</sup>Purdue University, Department of Entomology, 901 West State Street, West Lafayette, IN 47907, USA

<sup>d</sup>Milwaukee Public Museum, Department of Zoology, 800 W Wells Street, Milwaukee, WI 53233, USA

\*Corresponding author, e-mail: juliasnyder4@gmail.com

**Supplementary material**

| Dissimilarity Matrix | Phylogenetic Analysis | Dissection number (M/F) | 1     | 6     | 11    | 16    | 21    | 26    | 31 |
|----------------------|-----------------------|-------------------------|-------|-------|-------|-------|-------|-------|----|
| Cmin_001/Cmin_022    | Taxon00               | JS006/JS040             | ?1111 | 01011 | 10011 | 11100 | 01111 | 11110 | ?- |
| Cmin_002             | Taxon01               | JS035                   | 1-111 | 010?1 | 10011 | 11011 | 01101 | 1---- | -- |
| Cmin_003/Cmin_019    | Taxon02               | JS043/JMZ524            | ?1??? | ????? | ?0011 | 11011 | 01101 | 11110 | 11 |
| Cmin_004/Cmin_020    | Taxon03               | JS042/JMZ525            | ?1??? | ????? | ?0011 | 11011 | 11101 | 11110 | 11 |
| Cmin_005             | Taxon04               | JS039                   | 1-11? | 01011 | 10011 | 11101 | 01111 | 1---- | -- |
| Cmin_006             | Taxon05               | JS037                   | 1-111 | ??11  | ?0011 | 11101 | 0111? | 1---- | -- |
| Cmin_007/Cmin_016    | Taxon06               | JS030/JS031             | 11111 | ?1011 | 10011 | 11100 | 01111 | 11110 | 11 |
| Cmin_008/Cmin_018    | Taxon07               | JS032/JS029             | 11111 | 01011 | 10011 | 11100 | 0111? | 11110 | ?? |
| Cmin_009             | Taxon08               | JS041                   | 1-111 | 01011 | 10011 | 11100 | 0111? | ?---- | -- |
| Cmin_010             | Taxon09               | JMZ527                  | 1-111 | 01011 | 10011 | 11000 | 0111? | 1---- | -- |
| Cmin_011             | Taxon10               | JMZ526                  | 1-111 | 0101? | 10011 | 11001 | 0111? | 1---- | -- |
| Cmin_012             | Taxon11               | JS034                   | 1-??? | 01011 | 10011 | 11010 | 0111? | 1---- | -- |
| Cmin_013             | Taxon12               | JS033                   | 1-111 | 01011 | ?0011 | 11011 | 0110? | 1---- | -- |
| Cmin_014             | Taxon13               | USNM 42.319             | ?-??? | ????? | ?0011 | 11101 | 0111? | 1---- | -- |
| Cmin_015/Cmin_055    | Taxon14               | USNM 42.317/NHM #21837  | ????? | ????? | ?0011 | 11101 | 0111? | 11110 | 11 |
| Cmin_025             | Taxon15               | Noct.9938               | ?-??? | ????? | ?0011 | 11101 | 0111? | 1---- | -- |
| Cmin_026/Cmin_053    | Taxon16               | Noct.9939/NHM #21832    | ????? | ????? | ?0011 | 11011 | 0110? | 11110 | 11 |
| Cmin_027             | Taxon17               | Noct.9940               | ?-??? | ????? | ?0011 | 11011 | ?110? | ?---- | -- |
| Cmin_028             | Taxon18               | Noct.10061              | ?-??? | ????? | ?0011 | 11011 | 1110? | 1---- | -- |
| Cmin_029             | Taxon19               | Noct.10062              | ?-??? | ????? | ?0011 | 11101 | 0111? | 1---- | -- |
| Cmin_030/Cmin_023    | Taxon20               | Noct.10063/JS027        | ?1??? | ????? | ?0011 | 11101 | 0111? | 11110 | ?- |
| Cmin_031/Cmin_052    | Taxon21               | Noct.9917/NHM #21830    | ????? | ????? | ?0011 | 11100 | 0111? | 11110 | ?? |
| Cmin_032             | Taxon22               | Noct.10542              | ?-??? | ????? | ?0011 | 11101 | 0111? | 1---- | -- |
| Cmin_033             | Taxon23               | Noct.10543              | ?-??? | ????? | ?0011 | 11101 | 0111? | 1---- | -- |
| Cmin_034             | Taxon24               | Noct.10544              | ?-??? | ????? | ?0011 | 11001 | 0111? | 1---- | -- |
| Cmin_035             | Taxon25               | Noct.10545              | ?-??? | ????? | ?0011 | 11001 | 0111? | 1---- | -- |
| Cmin_036             | Taxon26               | Noct.10572              | ?-??? | ????? | ?0011 | 11101 | 0111? | 1---- | -- |
| Cmin_037             | Taxon27               | Noct.10573              | ?-??? | ????? | ?0011 | 11101 | 0111? | 1---- | -- |
| Cmin_038             | Taxon28               | Noct.10574              | ?-??? | ????? | ?0011 | 11001 | 0111? | 1---- | -- |
| Cmin_039             | Taxon29               | Noct.10575              | ?-??? | ????? | ?0011 | 11101 | 0110? | 1---- | -- |
| Cmin_040/Cmin_051    | Taxon30               | Noct.10576/NHM #21829   | ????? | ????? | ?0011 | 11101 | 0110? | 11110 | 11 |
| Cmin_041             | Taxon31               | NHM #21831              | ?-??? | ????? | ?0011 | 11101 | 01111 | 1---- | -- |
| Cmin_042             | Taxon32               | NHM #21833              | ?-??? | ????? | ?0011 | 11011 | 11101 | 1---- | -- |
| Cmin_043             | Taxon33               | NHM #21836              | ?-??? | ????? | ?0011 | 11011 | 11101 | 1---- | -- |
| Cmin_044/Cmin_054    | Taxon34               | Noct. 9758/NHM #21835   | ????? | ????? | ?0011 | 11100 | 0110? | 11110 | 11 |
| Cmin_045             | Taxon35               | Noct.1538               | ?-??? | ????? | ?0011 | 11100 | 0111? | 1---- | -- |
| Cmin_046             | Taxon36               | Noct.1539               | ?-??? | ????? | ?0011 | 11011 | 1110? | 1---- | -- |
| Cmin_047             | Taxon37               | Noct.1540               | ?-??? | ????? | ?0011 | 1110? | 0111? | 1---- | -- |
| Cmin_048             | Taxon38               | Noct.1541               | ?-??? | ????? | ?0011 | 11101 | 0111? | 1---- | -- |
| Cmin_049             | Taxon39               | Noct.1542               | ?-??? | ????? | ??11  | 11010 | 0110? | 1---- | -- |
| Cmin_050             | Taxon40               | Noct.1543               | ?-??? | ????? | ?0011 | 11011 | 0110? | 1---- | -- |
| Cmin_017             | Taxon41               | JS038                   | -1--- | ----- | ----- | ----- | ----- | -1110 | 11 |
| Cmin_024             | Taxon42               | JS028                   | -1--- | ----- | ----- | ----- | ----- | -1110 | ?? |
| Oema_001             | Taxon43               | JMZ389/JMZ388           | 01??? | 000?? | ?0110 | 00--? | 2000? | 12000 | 10 |
| Cfas_001             | Taxon44               | Noct. 9911/JMZ330       | 01??? | ????? | ?0012 | 20--1 | 2101? | 10220 | ?? |

**Fig. S1.** Data matrix.

**Supplementary Text S1.** Synopsis of characters and states used for the phylogenetic analysis.

**Head**

1. Male Antenna: Flagellomere shape. **0)** bipectinate; **1)** unidentata.
2. Female Antenna: Flagellomere shape. **0)** bipectinate; **1)** unidentata.
3. Proboscis: Tearing hooks in the apical region of the proboscis. **0)** absent; **1)** present.
4. Proboscis: Rasping spines occurring along the lateral and ventral margin of the proboscis. **0)** absent; **1)** present.
5. Proboscis: Apex of proboscis sclerotized forming a sharp point. **0)** absent; **1)** present.
6. Labial Palp: Size of first segment of the labial palp. **0)** short, half as long as segment 2
7. Labial Palp: Size of second segment of the labial palp. **0)** short, as long as segment 1; **1)** longer than segment 1.
8. Labial Palp: Size of third segment of the labial palp. **0)** short, thinner than segment 1.

**Thorax**

9. Prothoracic leg: Epiphysis occurring on tibia. **0)** absent; **1)** present.
10. Mesothoracic leg: One pair of spurs occurring on apical half of the tibia. **0)** absent; **1)** present.
11. Metathoracic leg: Two pairs of spurs occurring on apical half of the tibia. **0)** absent; **1)** present.

**Male Abdomen**

12. Genital capsule: Shape of the saccus. **1)** v-shaped.
13. Genital capsule: Sclerotization of saccus. **0)** not contiguous; **1)** contiguous.
14. Genital capsule: Shape of sacculus. **1)** Contiguous with costa.
15. Genital capsule: Shape of the apex of the sacculus. **0)** entire; **1)** forked; **2)** long, thin, sharp point
16. Genital capsule: Process of the sacculus. **0)** absent; **1)** small, tooth-like with rounded point **2)** rounded, lobe-like.
17. Genital capsule: Processi of juxta. **0)** absent; **1)** present.
18. Genital capsule: Processi of the juxta shape round. **0)** absent; **1)** present
19. Genital capsule: Size of processi (from middle of process). **0)** higher than wide or subequal; **1)** wider than high
20. Genital capsule: Size of juxta (including processi, using widest and highest part as reference). **0)** higher than wide or subequal; **1)** wider than high.
21. Genital capsule: Shape of the uncus. **0)** broadly uniform before narrowing at terminus, hook not prominent; **1)** greatly expanding before narrowing at terminus, hook not prominent; **2)** greatly expanding before narrowing at terminus, hook prominent
22. Aedeagus: Orientation. **0)** straight; **1)** L-shaped.
23. Aedeagus: Cornuti occurring on the inner margin of the curvature. **0)** absent; **1)** present.
24. Aedeagus: Cornuti occurring on the outside of the curvature. **0)** absent; **1)** present.
25. Aedeagus: Vesica lobes. **0)** absent; **1)** present.
26. Aedeagus: Ornamentation of vesica lobes. **0)** absent; **1)** present

### **Female Abdomen**

27. Genitalia: Shape of the ductus bursae. **0)** long, heavily sclerotized tube; **1)** long, thin(tube-like), wider near connection to corpus bursae; **2)** short, wrinkled.
28. Genitalia: Shape of the corpus bursae. **0)** round; **1)** long, thin, bulging towards terminus; **2)** sac-like, unremarkable
29. Genitalia: Surface condition of the corpus bursae. **0)** Heavily wrinkled; **1)** relatively smooth, with wrinkling throughout; **2)** wrinkled, but also stippled
30. Genitalia: Signa of the corpus bursae. **0)** absent; **1)** present.
31. Genitalia: Swollen appendix bursae. **0)** absent; **1)** present.
32. Genitalia: Shape of appendix bursae. **1)** sac-like, unremarkable.
